# Supplementary material for: Theoretical-computational modeling of photo-induced charge separation spectra and charge recombination kinetics in solution
Source: Royal Society of Chemistry journal article supplement (doi:10.1039/c4cp02422b), 2014-01-01
Supplement: c4cp02422b1.pdf [file c4cp02422b1.pdf]

# Theoretical-computational modeling of photo-induced charge separation spectrum and charge recombination kinetics in solution.

Giovanni Piacente<sup>a</sup>, Andrea Amadei<sup>b</sup>, Marco D'Abramo<sup>c</sup>, Isabella Daidone<sup>a</sup>, Massimiliano Aschi<sup>a</sup>

## SUPPLEMENTARY INFORMATION

### 1. Gromacs format topologies

#### BENZENE

[ moleculetype ]

; Name nrexcl

benzene 3

[ atoms ]

| ; nr | type | resnr | resid | atom | cgnr | charge | mass    |
|------|------|-------|-------|------|------|--------|---------|
| 1    | C    | 1     | DRG   | C    | 1    | -0.110 | 12.0110 |
| 2    | C    | 1     | DRG   | C    | 1    | -0.110 | 12.0110 |
| 3    | C    | 1     | DRG   | C    | 1    | -0.110 | 12.0110 |
| 4    | C    | 1     | DRG   | C    | 1    | -0.110 | 12.0110 |
| 5    | C    | 1     | DRG   | C    | 1    | -0.110 | 12.0110 |
| 6    | C    | 1     | DRG   | C    | 1    | -0.110 | 12.0110 |
| 7    | HC   | 1     | DRG   | H    | 1    | 0.110  | 1.0080  |
| 8    | HC   | 1     | DRG   | H    | 1    | 0.110  | 1.0080  |
| 9    | HC   | 1     | DRG   | H    | 1    | 0.110  | 1.0080  |
| 10   | HC   | 1     | DRG   | H    | 1    | 0.110  | 1.0080  |
| 11   | HC   | 1     | DRG   | H    | 1    | 0.110  | 1.0080  |
| 12   | HC   | 1     | DRG   | H    | 1    | 0.110  | 1.0080  |

[ bonds ]

| ; ai | aj | fu | c0,   | c1, ...    |
|------|----|----|-------|------------|
| 1    | 2  | 2  | 0.139 | 10800000.0 |
| 2    | 3  | 2  | 0.139 | 10800000.0 |
| 3    | 4  | 2  | 0.139 | 10800000.0 |
| 4    | 5  | 2  | 0.139 | 10800000.0 |
| 5    | 6  | 2  | 0.139 | 10800000.0 |
| 6    | 1  | 2  | 0.139 | 10800000.0 |
| 1    | 7  | 2  | 0.108 | 12300000.0 |
| 2    | 8  | 2  | 0.108 | 12300000.0 |
| 3    | 9  | 2  | 0.108 | 12300000.0 |
| 4    | 10 | 2  | 0.108 | 12300000.0 |

|   |    |   |       |            |
|---|----|---|-------|------------|
| 5 | 11 | 2 | 0.108 | 12300000.0 |
| 6 | 12 | 2 | 0.108 | 12300000.0 |

[ pairs ]

; ai aj fu c0, c1, ...

|    |    |   |
|----|----|---|
| 1  | 9  | 1 |
| 1  | 4  | 1 |
| 1  | 11 | 1 |
| 2  | 10 | 1 |
| 2  | 5  | 1 |
| 2  | 12 | 1 |
| 3  | 11 | 1 |
| 3  | 6  | 1 |
| 3  | 7  | 1 |
| 4  | 8  | 1 |
| 4  | 12 | 1 |
| 5  | 9  | 1 |
| 5  | 7  | 1 |
| 6  | 10 | 1 |
| 6  | 8  | 1 |
| 7  | 8  | 1 |
| 8  | 9  | 1 |
| 9  | 10 | 1 |
| 10 | 11 | 1 |
| 11 | 12 | 1 |
| 12 | 7  | 1 |

[ angles ]

; ai aj ak fu c0, c1, ...

|    |   |    |   |         |       |
|----|---|----|---|---------|-------|
| 6  | 1 | 7  | 2 | 120.000 | 505.0 |
| 6  | 1 | 2  | 2 | 120.000 | 505.0 |
| 7  | 1 | 2  | 2 | 120.000 | 505.0 |
| 1  | 2 | 3  | 2 | 120.000 | 505.0 |
| 1  | 2 | 8  | 2 | 120.000 | 505.0 |
| 8  | 2 | 3  | 2 | 120.000 | 505.0 |
| 2  | 3 | 9  | 2 | 120.000 | 505.0 |
| 2  | 3 | 4  | 2 | 120.000 | 505.0 |
| 9  | 3 | 4  | 2 | 120.000 | 505.0 |
| 3  | 4 | 10 | 2 | 120.000 | 505.0 |
| 3  | 4 | 5  | 2 | 120.000 | 505.0 |
| 10 | 4 | 5  | 2 | 120.000 | 505.0 |
| 4  | 5 | 11 | 2 | 120.000 | 505.0 |
| 4  | 5 | 6  | 2 | 120.000 | 505.0 |
| 6  | 5 | 11 | 2 | 120.000 | 505.0 |
| 5  | 6 | 12 | 2 | 120.000 | 505.0 |
| 5  | 6 | 1  | 2 | 120.000 | 505.0 |

1 6 12 2 120.000 505.0

[ dihedrals ]

```
; ai aj ak al fu c0, c1, m, ...
  4  3  2  1  2  0.0 167.423
  4  5  6  1  2  0.0 167.423
  3  2  1  6  2  0.0 167.423
  3  4  5  6  2  0.0 167.423
  2  1  6  5  2  0.0 167.423
  2  3  4  5  2  0.0 167.423
  3  4  2  9  2  0.0 167.423
  2  1  3  8  2  0.0 167.423
  5  4  6 11  2  0.0 167.423
  6  1  5 12  2  0.0 167.423
  1  6  2  7  2  0.0 167.423
  4  5  3 10  2  0.0 167.423
```

## INDENE

[ moleculetype ]

; Name nrexcl

indene 3

[ atoms ]

```
; nr type resnr resid atom cgnr charge mass
  1 C 1 DRG C 1 -0.222 12.0110
  2 C 1 DRG C 1 0.198 12.0110
  3 C 1 DRG C 1 0.101 12.0110
  4 C 1 DRG C 1 -0.223 12.0110
  5 C 1 DRG C 1 -0.114 12.0110
  6 C 1 DRG C 1 -0.153 12.0110
  7 HC 1 DRG H 1 0.138 1.0080
  8 C 1 DRG C 1 -0.328 12.0110
  9 C 1 DRG C 1 -0.165 12.0110
 10 HC 1 DRG H 1 0.132 1.0080
 11 HC 1 DRG H 1 0.120 1.0080
 12 HC 1 DRG H 1 0.128 1.0080
 13 C 1 DRG C 1 -0.066 12.0110
 14 HC 1 DRG H 1 0.167 1.0080
 15 HC 1 DRG H 1 0.104 1.0080
 16 HC 1 DRG H 1 0.092 1.0080
 17 HC 1 DRG H 1 0.092 1.0080
```

[ bonds ]

```
; ai aj fu c0, c1, ...
  1  2  2  0.139 10800000.0
```

|    |    |   |       |            |
|----|----|---|-------|------------|
| 2  | 3  | 2 | 0.139 | 10800000.0 |
| 3  | 4  | 2 | 0.139 | 10800000.0 |
| 4  | 5  | 2 | 0.139 | 10800000.0 |
| 5  | 6  | 2 | 0.139 | 10800000.0 |
| 6  | 1  | 2 | 0.139 | 10800000.0 |
| 1  | 7  | 2 | 0.108 | 12300000.0 |
| 2  | 8  | 2 | 0.147 | 11800000.0 |
| 3  | 9  | 2 | 0.151 | 11800000.0 |
| 4  | 10 | 2 | 0.108 | 12300000.0 |
| 5  | 11 | 2 | 0.108 | 12300000.0 |
| 6  | 12 | 2 | 0.108 | 12300000.0 |
| 8  | 13 | 2 | 0.134 | 11800000.0 |
| 13 | 9  | 2 | 0.151 | 11800000.0 |
| 8  | 14 | 2 | 0.108 | 12300000.0 |
| 13 | 15 | 2 | 0.108 | 12300000.0 |
| 9  | 16 | 2 | 0.110 | 12300000.0 |
| 9  | 17 | 2 | 0.110 | 12300000.0 |

[ pairs ]

; ai aj fu c0, c1, ...

|    |    |   |  |  |
|----|----|---|--|--|
| 1  | 9  | 1 |  |  |
| 1  | 4  | 1 |  |  |
| 1  | 11 | 1 |  |  |
| 2  | 10 | 1 |  |  |
| 2  | 5  | 1 |  |  |
| 2  | 12 | 1 |  |  |
| 3  | 11 | 1 |  |  |
| 3  | 6  | 1 |  |  |
| 3  | 7  | 1 |  |  |
| 4  | 8  | 1 |  |  |
| 4  | 12 | 1 |  |  |
| 5  | 9  | 1 |  |  |
| 5  | 7  | 1 |  |  |
| 6  | 10 | 1 |  |  |
| 6  | 8  | 1 |  |  |
| 7  | 8  | 1 |  |  |
| 8  | 9  | 1 |  |  |
| 9  | 10 | 1 |  |  |
| 10 | 11 | 1 |  |  |
| 11 | 12 | 1 |  |  |
| 12 | 7  | 1 |  |  |
| 13 | 3  | 1 |  |  |
| 13 | 1  | 1 |  |  |
| 13 | 4  | 1 |  |  |
| 14 | 15 | 1 |  |  |
| 14 | 7  | 1 |  |  |

|    |    |   |
|----|----|---|
| 14 | 3  | 1 |
| 14 | 9  | 1 |
| 15 | 2  | 1 |
| 15 | 3  | 1 |
| 15 | 16 | 1 |
| 15 | 17 | 1 |
| 16 | 8  | 1 |
| 16 | 4  | 1 |
| 16 | 2  | 1 |
| 17 | 8  | 1 |
| 17 | 4  | 1 |
| 17 | 2  | 1 |

[ angles ]

| ;  | ai | aj | ak | fu | c0,     | c1, ... |
|----|----|----|----|----|---------|---------|
|    | 6  | 1  | 7  | 2  | 120.000 | 505.0   |
|    | 6  | 1  | 2  | 2  | 120.000 | 505.0   |
|    | 7  | 1  | 2  | 2  | 120.000 | 505.0   |
|    | 1  | 2  | 3  | 2  | 120.000 | 560.0   |
|    | 1  | 2  | 8  | 2  | 131.000 | 760.0   |
|    | 8  | 2  | 3  | 2  | 108.000 | 465.0   |
|    | 2  | 3  | 9  | 2  | 109.000 | 465.0   |
|    | 2  | 3  | 4  | 2  | 120.000 | 560.0   |
|    | 9  | 3  | 4  | 2  | 131.000 | 760.0   |
|    | 3  | 4  | 10 | 2  | 120.000 | 505.0   |
|    | 3  | 4  | 5  | 2  | 120.000 | 505.0   |
| 10 | 4  | 5  | 5  | 2  | 120.000 | 505.0   |
|    | 4  | 5  | 11 | 2  | 120.000 | 505.0   |
|    | 4  | 5  | 6  | 2  | 120.000 | 505.0   |
|    | 6  | 5  | 11 | 2  | 120.000 | 505.0   |
|    | 5  | 6  | 12 | 2  | 120.000 | 505.0   |
|    | 5  | 6  | 1  | 2  | 120.000 | 505.0   |
|    | 1  | 6  | 12 | 2  | 120.000 | 505.0   |
|    | 2  | 8  | 14 | 2  | 124.000 | 575.0   |
|    | 2  | 8  | 13 | 2  | 110.000 | 465.0   |
| 14 | 8  | 13 | 2  | 2  | 126.000 | 575.0   |
|    | 8  | 13 | 15 | 2  | 126.000 | 575.0   |
|    | 8  | 13 | 9  | 2  | 110.000 | 465.0   |
|    | 9  | 13 | 15 | 2  | 123.000 | 575.0   |
| 13 | 9  | 17 | 2  | 2  | 112.000 | 425.0   |
| 13 | 9  | 16 | 2  | 2  | 112.000 | 425.0   |
| 13 | 9  | 3  | 2  | 2  | 103.000 | 465.0   |
| 16 | 9  | 17 | 2  | 2  | 106.000 | 380.0   |
|    | 3  | 9  | 16 | 2  | 112.000 | 425.0   |
|    | 3  | 9  | 17 | 2  | 112.000 | 425.0   |

[ dihedrals ]

```
; ai aj ak al fu c0, c1, m, ...
  4  3  2  1  2  0.0 167.423
  4  5  6  1  2  0.0 167.423
  3  2  1  6  2  0.0 167.423
  3  4  5  6  2  0.0 167.423
  2  1  6  5  2  0.0 167.423
  2  3  4  5  2  0.0 167.423
  3  4  2  9  2  0.0 167.423
  2  1  3  8  2  0.0 167.423
  5  4  6 11  2  0.0 167.423
  6  1  5 12  2  0.0 167.423
  1  6  2  7  2  0.0 167.423
  4  5  3 10  2  0.0 167.423
  3  2  8 13  2  0.0 167.423
  2  8 13  9  2  0.0 167.423
  8 13  9  3  2  0.0 167.423
  8  2 13 14  2  0.0 167.423
 13  9  8 15  2  0.0 167.423
  2  3  9 17  2 120.0 167.423
  2  3  9 16  2 240.0 167.423
```

## TCNE

[ moleculetype ]

; Name nrexcl

tetracianoetilene 3

[ atoms ]

```
; nr      type  resnr resid  atom  cgnr  charge  mass
  1        C     1  TCNE    C     1   -0.082 12.0110
  2        C     1  TCNE    C     1   -0.082 12.0110
  3        C     1  TCNE    C     1    0.379 12.0110
  4        C     1  TCNE    C     1    0.379 12.0110
  5        C     1  TCNE    C     1    0.379 12.0110
  6        C     1  TCNE    C     1    0.379 12.0110
  7        NR     1  TCNE    N     1   -0.338 14.0070
  8        NR     1  TCNE    N     1   -0.338 14.0070
  9        NR     1  TCNE    N     1   -0.338 14.0070
 10        NR     1  TCNE    N     1   -0.338 14.0070
```

[ bonds ]

```
; ai aj fu c0, c1, ...
  1  2  2  0.134 10800000.0
  2  3  2  0.143  5730000.0
  2  4  2  0.143  5730000.0
  1  5  2  0.143  5730000.0
```

|   |    |   |       |            |
|---|----|---|-------|------------|
| 1 | 6  | 2 | 0.143 | 5730000.0  |
| 3 | 7  | 2 | 0.115 | 42000000.0 |
| 4 | 8  | 2 | 0.115 | 42000000.0 |
| 5 | 9  | 2 | 0.115 | 42000000.0 |
| 6 | 10 | 2 | 0.115 | 42000000.0 |
| 5 | 4  | 2 | 0.284 | 42000000.0 |
| 3 | 6  | 2 | 0.284 | 42000000.0 |

[ pairs ]

| ; ai | aj | fu | c0, c1, ... |
|------|----|----|-------------|
| 1    | 7  | 1  |             |
| 1    | 8  | 1  |             |
| 2    | 9  | 1  |             |
| 2    | 10 | 1  |             |
| 3    | 8  | 1  |             |
| 3    | 5  | 1  |             |
| 3    | 6  | 1  |             |
| 4    | 7  | 1  |             |
| 4    | 5  | 1  |             |
| 4    | 6  | 1  |             |
| 5    | 10 | 1  |             |
| 6    | 9  | 1  |             |
| 8    | 7  | 1  |             |
| 9    | 10 | 1  |             |

[ angles ]

| ; ai | aj | ak | fu | c0, c1, ...   |
|------|----|----|----|---------------|
| 1    | 6  | 3  | 2  | 58.2 960.0    |
| 1    | 6  | 10 | 2  | 180.0 960.0   |
| 10   | 6  | 3  | 2  | 121.8 960.0   |
| 1    | 5  | 4  | 2  | 58.2 960.0    |
| 1    | 5  | 9  | 2  | 180.0 960.0   |
| 9    | 5  | 4  | 2  | 121.8 960.0   |
| 2    | 4  | 5  | 2  | 58.2 960.0    |
| 2    | 4  | 8  | 2  | 180.0 960.0   |
| 8    | 4  | 5  | 2  | 121.8 960.0   |
| 2    | 3  | 6  | 2  | 58.2 960.0    |
| 2    | 3  | 7  | 2  | 180.0 960.0   |
| 7    | 3  | 6  | 2  | 121.8 960.0   |
| 6    | 1  | 2  | 2  | 120.000 560.0 |
| 6    | 1  | 5  | 2  | 120.000 560.0 |
| 5    | 1  | 2  | 2  | 120.000 560.0 |
| 1    | 2  | 3  | 2  | 120.000 560.0 |
| 1    | 2  | 4  | 2  | 120.000 560.0 |
| 3    | 2  | 4  | 2  | 120.000 560.0 |

```
[ dihedrals ]
; ai aj ak al fu c0, c1, m, ...
  6  1  2  3  2  0.0 600.0
  5  1  2  4  2  0.0 600.0
  6  2  5  1  2  gi_1
  3  1  4  2  2  gi_1
```

### BENZENE RADICAL CATION

```
[ moleculetype ]
```

```
; Name nrexcl
```

```
benzene 3
```

```
[ atoms ]
```

| nr | type | resnr | resid | atom | cgnr | charge | mass    |
|----|------|-------|-------|------|------|--------|---------|
| 1  | C    | 1     | DRG   | C    | 1    | 0.003  | 12.0110 |
| 2  | C    | 1     | DRG   | C    | 1    | 0.003  | 12.0110 |
| 3  | C    | 1     | DRG   | C    | 1    | 0.003  | 12.0110 |
| 4  | C    | 1     | DRG   | C    | 1    | 0.003  | 12.0110 |
| 5  | C    | 1     | DRG   | C    | 1    | 0.003  | 12.0110 |
| 6  | C    | 1     | DRG   | C    | 1    | 0.003  | 12.0110 |
| 7  | HC   | 1     | DRG   | H    | 1    | 0.163  | 1.0080  |
| 8  | HC   | 1     | DRG   | H    | 1    | 0.163  | 1.0080  |
| 9  | HC   | 1     | DRG   | H    | 1    | 0.163  | 1.0080  |
| 10 | HC   | 1     | DRG   | H    | 1    | 0.163  | 1.0080  |
| 11 | HC   | 1     | DRG   | H    | 1    | 0.163  | 1.0080  |
| 12 | HC   | 1     | DRG   | H    | 1    | 0.164  | 1.0080  |

```
[ bonds ]
```

```
; ai aj fu c0, c1, ...
  1  2  2  0.139 10800000.0
  2  3  2  0.139 10800000.0
  3  4  2  0.139 10800000.0
  4  5  2  0.139 10800000.0
  5  6  2  0.139 10800000.0
  6  1  2  0.139 10800000.0
  1  7  2  0.108 12300000.0
  2  8  2  0.108 12300000.0
  3  9  2  0.108 12300000.0
  4 10  2  0.108 12300000.0
  5 11  2  0.108 12300000.0
  6 12  2  0.108 12300000.0
```

```
[ pairs ]
```

```
; ai aj fu c0, c1, ...
```



```

1  9  1
1  4  1
1 11  1
2 10  1
2  5  1
2 12  1
3 11  1
3  6  1
3  7  1
4  8  1
4 12  1
5  9  1
5  7  1
6 10  1
6  8  1
7  8  1
8  9  1
9 10  1
10 11  1
11 12  1
12  7  1

```

[ angles ]

```

; ai  aj  ak  fu    c0, c1, ...
  6   1   7   2    120.000  505.0
  6   1   2   2    120.000  505.0
  7   1   2   2    120.000  505.0
  1   2   3   2    120.000  505.0
  1   2   8   2    120.000  505.0
  8   2   3   2    120.000  505.0
  2   3   9   2    120.000  505.0
  2   3   4   2    120.000  505.0
  9   3   4   2    120.000  505.0
  3   4  10   2    120.000  505.0
  3   4   5   2    120.000  505.0
10   4   5   2    120.000  505.0
  4   5  11   2    120.000  505.0
  4   5   6   2    120.000  505.0
  6   5  11   2    120.000  505.0
  5   6  12   2    120.000  505.0
  5   6   1   2    120.000  505.0
  1   6  12   2    120.000  505.0

```

[ dihedrals ]

```

; ai  aj  ak  al  fu    c0, c1, m, ...
  4   3   2   1   2    0.0 167.423

```

|   |   |   |    |   |     |         |
|---|---|---|----|---|-----|---------|
| 4 | 5 | 6 | 1  | 2 | 0.0 | 167.423 |
| 3 | 2 | 1 | 6  | 2 | 0.0 | 167.423 |
| 3 | 4 | 5 | 6  | 2 | 0.0 | 167.423 |
| 2 | 1 | 6 | 5  | 2 | 0.0 | 167.423 |
| 2 | 3 | 4 | 5  | 2 | 0.0 | 167.423 |
| 3 | 4 | 2 | 9  | 2 | 0.0 | 167.423 |
| 2 | 1 | 3 | 8  | 2 | 0.0 | 167.423 |
| 5 | 4 | 6 | 11 | 2 | 0.0 | 167.423 |
| 6 | 1 | 5 | 12 | 2 | 0.0 | 167.423 |
| 1 | 6 | 2 | 7  | 2 | 0.0 | 167.423 |
| 4 | 5 | 3 | 10 | 2 | 0.0 | 167.423 |

### INDENE RADICAL CATION

[ moleculetype ]

; Name nrexcl

indene 3

[ atoms ]

| ; | nr | type | resnr | resid | atom | cgnr | charge | mass    |
|---|----|------|-------|-------|------|------|--------|---------|
|   | 1  | C    | 1     | DRG   | C    | 1    | -0.153 | 12.0110 |
|   | 2  | C    | 1     | DRG   | C    | 1    | 0.249  | 12.0110 |
|   | 3  | C    | 1     | DRG   | C    | 1    | 0.233  | 12.0110 |
|   | 4  | C    | 1     | DRG   | C    | 1    | -0.290 | 12.0110 |
|   | 5  | C    | 1     | DRG   | C    | 1    | 0.100  | 12.0110 |
|   | 6  | C    | 1     | DRG   | C    | 1    | -0.156 | 12.0110 |
|   | 7  | HC   | 1     | DRG   | H    | 1    | 0.192  | 1.0080  |
|   | 8  | C    | 1     | DRG   | C    | 1    | -0.285 | 12.0110 |
|   | 9  | C    | 1     | DRG   | C    | 1    | -0.356 | 12.0110 |
|   | 10 | HC   | 1     | DRG   | H    | 1    | 0.207  | 1.0080  |
|   | 11 | HC   | 1     | DRG   | H    | 1    | 0.153  | 1.0080  |
|   | 12 | HC   | 1     | DRG   | H    | 1    | 0.185  | 1.0080  |
|   | 13 | C    | 1     | DRG   | C    | 1    | 0.180  | 12.0110 |
|   | 14 | HC   | 1     | DRG   | H    | 1    | 0.221  | 1.0080  |
|   | 15 | HC   | 1     | DRG   | H    | 1    | 0.146  | 1.0080  |
|   | 16 | HC   | 1     | DRG   | H    | 1    | 0.187  | 1.0080  |
|   | 17 | HC   | 1     | DRG   | H    | 1    | 0.187  | 1.0080  |

[ bonds ]

| ; | ai | aj | fu | c0, c1, ...      |
|---|----|----|----|------------------|
|   | 1  | 2  | 2  | 0.139 10800000.0 |
|   | 2  | 3  | 2  | 0.139 10800000.0 |
|   | 3  | 4  | 2  | 0.139 10800000.0 |
|   | 4  | 5  | 2  | 0.139 10800000.0 |
|   | 5  | 6  | 2  | 0.139 10800000.0 |
|   | 6  | 1  | 2  | 0.139 10800000.0 |

|    |    |   |       |            |
|----|----|---|-------|------------|
| 1  | 7  | 2 | 0.108 | 12300000.0 |
| 2  | 8  | 2 | 0.147 | 11800000.0 |
| 3  | 9  | 2 | 0.151 | 11800000.0 |
| 4  | 10 | 2 | 0.108 | 12300000.0 |
| 5  | 11 | 2 | 0.108 | 12300000.0 |
| 6  | 12 | 2 | 0.108 | 12300000.0 |
| 8  | 13 | 2 | 0.134 | 11800000.0 |
| 13 | 9  | 2 | 0.151 | 11800000.0 |
| 8  | 14 | 2 | 0.108 | 12300000.0 |
| 13 | 15 | 2 | 0.108 | 12300000.0 |
| 9  | 16 | 2 | 0.110 | 12300000.0 |
| 9  | 17 | 2 | 0.110 | 12300000.0 |

[ pairs ]

; ai aj fu c0, c1, ...

|    |    |   |
|----|----|---|
| 1  | 9  | 1 |
| 1  | 4  | 1 |
| 1  | 11 | 1 |
| 2  | 10 | 1 |
| 2  | 5  | 1 |
| 2  | 12 | 1 |
| 3  | 11 | 1 |
| 3  | 6  | 1 |
| 3  | 7  | 1 |
| 4  | 8  | 1 |
| 4  | 12 | 1 |
| 5  | 9  | 1 |
| 5  | 7  | 1 |
| 6  | 10 | 1 |
| 6  | 8  | 1 |
| 7  | 8  | 1 |
| 8  | 9  | 1 |
| 9  | 10 | 1 |
| 10 | 11 | 1 |
| 11 | 12 | 1 |
| 12 | 7  | 1 |
| 13 | 3  | 1 |
| 13 | 1  | 1 |
| 13 | 4  | 1 |
| 14 | 15 | 1 |
| 14 | 7  | 1 |
| 14 | 3  | 1 |
| 14 | 9  | 1 |
| 15 | 2  | 1 |
| 15 | 3  | 1 |
| 15 | 16 | 1 |

```

15 17 1
16  8 1
16  4 1
16  2 1
17  8 1
17  4 1
17  2 1

```

[ angles ]

```

; ai  aj  ak  fu    c0, c1, ...
   6   1   7   2    120.000  505.0
   6   1   2   2    120.000  505.0
   7   1   2   2    120.000  505.0
   1   2   3   2    120.000  560.0
   1   2   8   2    131.000  760.0
   8   2   3   2    108.000  465.0
   2   3   9   2    109.000  465.0
   2   3   4   2    120.000  560.0
   9   3   4   2    131.000  760.0
   3   4  10   2    120.000  505.0
   3   4   5   2    120.000  505.0
  10   4   5   2    120.000  505.0
   4   5  11   2    120.000  505.0
   4   5   6   2    120.000  505.0
   6   5  11   2    120.000  505.0
   5   6  12   2    120.000  505.0
   5   6   1   2    120.000  505.0
   1   6  12   2    120.000  505.0
   2   8  14   2    124.000  575.0
   2   8  13   2    110.000  465.0
  14   8  13   2    126.000  575.0
   8  13  15   2    126.000  575.0
   8  13   9   2    110.000  465.0
   9  13  15   2    123.000  575.0
  13   9  17   2    112.000  425.0
  13   9  16   2    112.000  425.0
  13   9   3   2    103.000  465.0
  16   9  17   2    106.000  380.0
   3   9  16   2    112.000  425.0
   3   9  17   2    112.000  425.0

```

[ dihedrals ]

```

; ai  aj  ak  al  fu    c0, c1, m, ...
   4   3   2   1   2    0.0 167.423
   4   5   6   1   2    0.0 167.423
   3   2   1   6   2    0.0 167.423

```

|    |    |    |    |   |       |         |
|----|----|----|----|---|-------|---------|
| 3  | 4  | 5  | 6  | 2 | 0.0   | 167.423 |
| 2  | 1  | 6  | 5  | 2 | 0.0   | 167.423 |
| 2  | 3  | 4  | 5  | 2 | 0.0   | 167.423 |
| 3  | 4  | 2  | 9  | 2 | 0.0   | 167.423 |
| 2  | 1  | 3  | 8  | 2 | 0.0   | 167.423 |
| 5  | 4  | 6  | 11 | 2 | 0.0   | 167.423 |
| 6  | 1  | 5  | 12 | 2 | 0.0   | 167.423 |
| 1  | 6  | 2  | 7  | 2 | 0.0   | 167.423 |
| 4  | 5  | 3  | 10 | 2 | 0.0   | 167.423 |
| 3  | 2  | 8  | 13 | 2 | 0.0   | 167.423 |
| 2  | 8  | 13 | 9  | 2 | 0.0   | 167.423 |
| 8  | 13 | 9  | 3  | 2 | 0.0   | 167.423 |
| 8  | 2  | 13 | 14 | 2 | 0.0   | 167.423 |
| 13 | 9  | 8  | 15 | 2 | 0.0   | 167.423 |
| 2  | 3  | 9  | 17 | 2 | 120.0 | 167.423 |
| 2  | 3  | 9  | 16 | 2 | 240.0 | 167.423 |

### TCNE RADICAL ANION

[ moleculetype ]

; Name nrexcl

tetracianoetilene 3

[ atoms ]

| ; | nr | type | resnr | resid | atom | cgnr | charge | mass    |
|---|----|------|-------|-------|------|------|--------|---------|
|   | 1  | C    | 1     | TCNE  | C    | 1    | -0.310 | 12.0110 |
|   | 2  | C    | 1     | TCNE  | C    | 1    | -0.310 | 12.0110 |
|   | 3  | C    | 1     | TCNE  | C    | 1    | 0.443  | 12.0110 |
|   | 4  | C    | 1     | TCNE  | C    | 1    | 0.443  | 12.0110 |
|   | 5  | C    | 1     | TCNE  | C    | 1    | 0.443  | 12.0110 |
|   | 6  | C    | 1     | TCNE  | C    | 1    | 0.443  | 12.0110 |
|   | 7  | NR   | 1     | TCNE  | N    | 1    | -0.538 | 14.0070 |
|   | 8  | NR   | 1     | TCNE  | N    | 1    | -0.538 | 14.0070 |
|   | 9  | NR   | 1     | TCNE  | N    | 1    | -0.538 | 14.0070 |
|   | 10 | NR   | 1     | TCNE  | N    | 1    | -0.538 | 14.0070 |

[ bonds ]

| ; | ai | aj | fu | c0, c1, ...      |
|---|----|----|----|------------------|
|   | 1  | 2  | 2  | 0.134 10800000.0 |
|   | 2  | 3  | 2  | 0.143 5730000.0  |
|   | 2  | 4  | 2  | 0.143 5730000.0  |
|   | 1  | 5  | 2  | 0.143 5730000.0  |
|   | 1  | 6  | 2  | 0.143 5730000.0  |
|   | 3  | 7  | 2  | 0.115 42000000.0 |
|   | 4  | 8  | 2  | 0.115 42000000.0 |
|   | 5  | 9  | 2  | 0.115 42000000.0 |
|   | 6  | 10 | 2  | 0.115 42000000.0 |

```
5 4 2 0.284 42000000.0
3 6 2 0.284 42000000.0
```

[ pairs ]

```
; ai aj fu c0, c1, ...
```

```
1 7 1
1 8 1
2 9 1
2 10 1
3 8 1
3 5 1
3 6 1
4 7 1
4 5 1
4 6 1
5 10 1
6 9 1
8 7 1
9 10 1
```

[ angles ]

```
; ai aj ak fu c0, c1, ...
```

```
1 6 3 2 58.2 960.0
1 6 10 2 180.0 960.0
10 6 3 2 121.8 960.0
1 5 4 2 58.2 960.0
1 5 9 2 180.0 960.0
9 5 4 2 121.8 960.0
2 4 5 2 58.2 960.0
2 4 8 2 180.0 960.0
8 4 5 2 121.8 960.0
2 3 6 2 58.2 960.0
2 3 7 2 180.0 960.0
7 3 6 2 121.8 960.0
6 1 2 2 120.000 560.0
6 1 5 2 120.000 560.0
5 1 2 2 120.000 560.0
1 2 3 2 120.000 560.0
1 2 4 2 120.000 560.0
3 2 4 2 120.000 560.0
```

[ dihedrals ]

```
; ai aj ak al fu c0, c1, m, ...
```

```
6 1 2 3 2 0.0 600.0
5 1 2 4 2 0.0 600.0
6 2 5 1 2 gi_1
```

## 2. Locally Relaxed Structures (see Table 1 of the text)

Bz-TCNE

|   |               |               |               |
|---|---------------|---------------|---------------|
| C | -1.6999137949 | 1.2141498852  | 1.2220166046  |
| C | -1.3088312587 | 0.0749024730  | 1.9200716237  |
| C | -1.5810928275 | -1.1907199110 | 1.4125048015  |
| C | -2.2580865919 | -1.3220505751 | 0.2044575409  |
| C | -2.6576030847 | -0.1771341780 | -0.4812274083 |
| C | -2.3717027409 | 1.0943261510  | 0.0104132775  |
| C | 1.4258106453  | 0.2452060189  | 0.1511399939  |
| C | 0.8990009194  | -0.1864228004 | -1.0167192545 |
| C | 0.8307912440  | -1.5781783361 | -1.3311153945 |
| C | 0.4188366206  | 0.7281858753  | -2.0032847156 |
| C | 1.5516003060  | 1.6389067522  | 0.4547756542  |
| C | 1.9622265565  | -0.6635152199 | 1.1146978469  |
| H | -1.4751041137 | 2.1953291805  | 1.6232753288  |
| H | -0.7897707506 | 0.1749328633  | 2.8666992534  |
| H | -1.2638349690 | -2.0702788473 | 1.9608301812  |
| H | -2.4757655967 | -2.3054309633 | -0.1949141520 |
| H | -3.1966959191 | -0.2793251656 | -1.4149392015 |

|   |               |               |               |
|---|---------------|---------------|---------------|
| H | -2.6786597728 | 1.9737358350  | -0.5388283392 |
| N | 0.7895260663  | -2.6920783440 | -1.5996740212 |
| N | 0.0499419602  | 1.4495098606  | -2.8147521257 |
| N | 1.6838476062  | 2.7482672444  | 0.7130783544  |
| N | 2.4139340553  | -1.3730427273 | 1.8941074401  |
| C | 3.0230170656  | -0.7888899280 | 0.2531179056  |
| C | 2.3012829430  | -1.3884963885 | -0.7724924245 |
| C | 1.5851163435  | -0.6129696371 | -1.6775184662 |
| C | 1.5823996666  | 0.7730319842  | -1.5561997127 |
| C | 2.3083248399  | 1.3653828790  | -0.5261507265 |
| C | 3.0284712774  | 0.5921204653  | 0.3799795385  |
| C | -1.2932420984 | -0.6222414469 | 0.5914212901  |
| C | -1.5160194958 | 0.6413151924  | 0.1711593443  |
| C | -1.0769502456 | 1.7712026200  | 0.9268872563  |
| C | -2.2020141308 | 0.9019812305  | -1.0530434910 |
| C | -1.7501642046 | -1.7600211556 | -0.1402517476 |
| C | -0.5994121580 | -0.8908370249 | 1.8147019966  |
| H | 3.5784325247  | -1.4009677258 | 0.9535797840  |
| H | 2.2976675194  | -2.4676960423 | -0.8685022166 |
| H | 1.0326404798  | -1.0906766903 | -2.4779689603 |
| H | 1.0376692487  | 1.3856825245  | -2.2649850722 |
| H | 2.3177219918  | 2.4445119903  | -0.4308232155 |



|   |               |               |               |
|---|---------------|---------------|---------------|
| H | 3.5748397029  | 1.0688623697  | 1.1852451743  |
| N | -0.7414317036 | 2.6875823877  | 1.5282081860  |
| N | -2.7504402535 | 1.1184409416  | -2.0362590113 |
| N | -2.1025306152 | -2.6940412402 | -0.7041705342 |
| N | -0.0521743964 | -1.1218559096 | 2.7955663031  |
| C | 3.4014728568  | -0.7595842708 | 0.3243717984  |
| C | 3.2228749795  | -1.1229451669 | -1.0034641364 |
| C | 2.5626210480  | -0.2670519268 | -1.8735561529 |
| C | 2.0872865979  | 0.9513208505  | -1.4136488697 |
| C | 2.2664414994  | 1.3209487666  | -0.0875621976 |
| C | 2.9221145425  | 0.4593435461  | 0.7822544682  |
| C | -1.2285039760 | 0.2774770254  | 0.7282137455  |
| C | -2.0692738011 | -0.4015939868 | -0.0867211588 |
| C | -2.1147764773 | -1.8290664927 | -0.0931309993 |
| C | -2.9579833365 | 0.2792451231  | -0.9740431951 |
| C | -1.1917236547 | 1.7070131737  | 0.7213583631  |
| C | -0.3711365803 | -0.4009373906 | 1.6450111569  |
| H | 3.9188070584  | -1.4258306648 | 1.0034711911  |
| H | 3.6035145161  | -2.0714440667 | -1.3627190283 |
| H | 2.4300186613  | -0.5409024661 | -2.9130753223 |
| H | 1.5811776207  | 1.6272057809  | -2.0943537355 |
| H | 1.9055232650  | 2.2816392051  | 0.2633762081  |

|   |               |               |               |
|---|---------------|---------------|---------------|
| H | 3.0630665555  | 0.7390169241  | 1.8195340588  |
| N | -2.1585616945 | -2.9743592502 | -0.1135620240 |
| N | -3.6827111336 | 0.8160946484  | -1.6821198016 |
| N | -1.1586873116 | 2.8529164530  | 0.7324882331  |
| N | 0.2915586722  | -0.9404616190 | 2.4087399056  |
| C | -2.4263879386 | 0.7733195684  | 0.8263757804  |
| C | -2.3944885576 | -0.6138264588 | 0.9016487767  |
| C | -2.0971377361 | -1.3612404761 | -0.2299683997 |
| C | -1.8260030485 | -0.7215613627 | -1.4325984800 |
| C | -1.8499414822 | 0.6664645248  | -1.5082000857 |
| C | -2.1613646485 | 1.4112800757  | -0.3794765415 |
| C | 1.1856541324  | 0.3846710324  | 0.7079112455  |
| C | 1.3731437308  | -0.4125148138 | -0.3660224143 |
| C | 1.6445094618  | 0.1365748253  | -1.6561951828 |
| C | 1.3341407415  | -1.8362709416 | -0.2581056897 |
| C | 0.9254741426  | -0.1566868906 | 2.0071467084  |
| C | 1.2672599603  | 1.8058277397  | 0.6075480618  |
| H | -2.6669393950 | 1.3565963130  | 1.7072452898  |
| H | -2.6060925509 | -1.1108601301 | 1.8406589216  |
| H | -2.0712448400 | -2.4427663279 | -0.1741420256 |
| H | -1.5975729469 | -1.3058951341 | -2.3163029167 |
| H | -1.6399773032 | 1.1645501842  | -2.4475952490 |

|   |               |               |               |
|---|---------------|---------------|---------------|
| H | -2.1982807606 | 2.4932875612  | -0.4363236664 |
| N | 1.8673311800  | 0.5660805223  | -2.6955326888 |
| N | 1.3272097297  | -2.9803810086 | -0.1831779858 |
| N | 0.7343501844  | -0.5753430556 | 3.0570651955  |
| N | 1.3358444824  | 2.9492568321  | 0.5553962441  |
|   |               |               |               |
| C | -1.6802719157 | 0.2797338933  | 1.7216237173  |
| C | -1.7540110873 | -0.9876254334 | 1.1560378269  |
| C | -2.2047884372 | -1.1390548295 | -0.1490985555 |
| C | -2.5977556472 | -0.0241446753 | -0.8800790804 |
| C | -2.5642875372 | 1.2374332366  | -0.2995858182 |
| C | -2.0773379252 | 1.3956868236  | 0.9911516509  |
| C | 1.0953765869  | -0.2401972311 | -0.8478747330 |
| C | 1.5001065253  | 0.1072537243  | 0.3922164396  |
| C | 1.6986330830  | -0.8804959577 | 1.4047366976  |
| C | 1.7691225982  | 1.4648031349  | 0.7418306146  |
| C | 0.9457844753  | 0.7168067864  | -1.9000141737 |
| C | 0.8366559967  | -1.6030363509 | -1.1928564859 |
| H | -1.3231780017 | 0.3946089466  | 2.7385284994  |
| H | -1.4547299940 | -1.8575384876 | 1.7290219646  |
| H | -2.2475222723 | -2.1244497616 | -0.5969855729 |
| H | -2.9549945389 | -0.1425051094 | -1.8962267668 |
| H | -2.8899880619 | 2.1011227699  | -0.8653013355 |

|   |               |               |               |
|---|---------------|---------------|---------------|
| H | -2.0301882585 | 2.3802720366  | 1.4392752681  |
| N | 1.8782353431  | -1.6702665295 | 2.2165211490  |
| N | 1.9943124641  | 2.5492308072  | 1.0376226772  |
| N | 0.8344650770  | 1.4654016060  | -2.7612562910 |
| N | 0.6511411196  | -2.6909905570 | -1.5035711083 |
| C | 1.6828014753  | 1.0296436062  | 1.3030414293  |
| C | 1.4183808483  | -0.3002202757 | 1.6117190215  |
| C | 2.1574449020  | -1.3126441862 | 1.0123528514  |
| C | 3.1640290645  | -0.9937554289 | 0.1081519260  |
| C | 3.4278718163  | 0.3335544041  | -0.1962515535 |
| C | 2.6848801580  | 1.3493912327  | 0.3941589856  |
| C | -1.2444245480 | -0.5966479254 | -0.6816174291 |
| C | -1.7034062889 | 0.5811941131  | -0.2026599792 |
| C | -1.2622826003 | 1.8342488620  | -0.7255558549 |
| C | -2.6458644069 | 0.6279785116  | 0.8697936297  |
| C | -1.6885295520 | -1.8432914745 | -0.1369354548 |
| C | -0.3038472984 | -0.6650974040 | -1.7539000613 |
| H | 1.1139037135  | 1.8183337749  | 1.7823185864  |
| H | 0.6461700341  | -0.5496556110 | 2.3311654483  |
| H | 1.9542451030  | -2.3490717694 | 1.2558747932  |
| H | 3.7396194780  | -1.7820944057 | -0.3602294797 |
| H | 4.1998240447  | 0.5788030219  | -0.9146121981 |

|   |               |               |               |
|---|---------------|---------------|---------------|
| H | 2.8922170116  | 2.3858100188  | 0.1594715344  |
| N | -0.9187819056 | 2.8517609552  | -1.1267473156 |
| N | -3.3997270656 | 0.6747259819  | 1.7328499460  |
| N | -2.0301922229 | -2.8528382872 | 0.2864730119  |
| N | 0.4365759720  | -0.7349786164 | -2.6256928812 |
| C | -2.6654648695 | -1.1549940331 | -0.2835043876 |
| C | -1.6753350921 | -1.1827049204 | -1.2572159573 |
| C | -1.1921348914 | 0.0106876530  | -1.7789323763 |
| C | -1.7134537186 | 1.2188115408  | -1.3362534157 |
| C | -2.7374329205 | 1.2474111569  | -0.4005396613 |
| C | -3.1859869517 | 0.0585122808  | 0.1527965607  |
| C | 1.6318032143  | 0.5340746231  | 0.2554511970  |
| C | 1.0452687480  | -0.5557068098 | 0.7962060689  |
| C | 0.0575069976  | -0.4498083591 | 1.8206961197  |
| C | 1.4183400868  | -1.8714485431 | 0.3814739971  |
| C | 2.6930488149  | 0.4026866114  | -0.6963253833 |
| C | 1.2808168826  | 1.8665567022  | 0.6305139087  |
| H | -3.0343355368 | -2.0833635219 | 0.1352974117  |
| H | -1.2830472322 | -2.1296837669 | -1.6102240209 |
| H | -0.4176619807 | -0.0008753442 | -2.5382165261 |
| H | -1.3432618928 | 2.1479207742  | -1.7553399200 |
| H | -3.1484509193 | 2.1942217431  | -0.0730199075 |

|   |               |               |               |
|---|---------------|---------------|---------------|
| H | -3.9570723502 | 0.0687838353  | 0.9123446746  |
| N | -0.7059640316 | -0.3889515558 | 2.6733168682  |
| N | 1.7141492776  | -2.9257192987 | 0.0420206994  |
| N | 3.5558518917  | 0.3204723057  | -1.4474593163 |
| N | 1.0180086096  | 2.9460588776  | 0.9136734391  |
| C | -2.7684045087 | 0.9390034865  | 0.2550102084  |
| C | -3.0788597386 | -0.4048778024 | 0.4110177225  |
| C | -2.6644691080 | -1.3311807032 | -0.5369021304 |
| C | -1.9324801780 | -0.9111845846 | -1.6395071754 |
| C | -1.6073372532 | 0.4330591776  | -1.7888786787 |
| C | -2.0339458618 | 1.3607965930  | -0.8473791686 |
| C | 1.5464115844  | 0.6094514339  | 0.1929205518  |
| C | 1.2230146439  | -0.6312727760 | 0.6198645753  |
| C | 1.7511967981  | -1.7916062019 | -0.0242114091 |
| C | 0.3706764434  | -0.8409992245 | 1.7457502740  |
| C | 1.0329752897  | 1.7820548257  | 0.8273251379  |
| C | 2.4626002549  | 0.8135481886  | -0.8876231796 |
| H | -3.0971312555 | 1.6595377075  | 0.9936566582  |
| H | -3.6397456255 | -0.7342361433 | 1.2769837438  |
| H | -2.9106435760 | -2.3797022571 | -0.4198972548 |
| H | -1.6118221531 | -1.6296811959 | -2.3843897442 |
| H | -1.0402362919 | 0.7577478602  | -2.6529152666 |

|   |               |               |               |
|---|---------------|---------------|---------------|
| H | -1.7987980048 | 2.4112272506  | -0.9707676363 |
| N | 2.1768678288  | -2.7259862224 | -0.5346194544 |
| N | -0.2894572266 | -1.0230148293 | 2.6652072307  |
| N | 0.6402602622  | 2.7404781329  | 1.3191230429  |
| N | 3.1940878243  | 1.0054955937  | -1.7494769493 |
| C | 2.6708891802  | -0.5827711575 | -0.4863033066 |
| C | 2.1862730677  | -1.4064187275 | 0.5211256531  |
| C | 1.6871308877  | -0.8414009012 | 1.6863444173  |
| C | 1.6774507641  | 0.5389899880  | 1.8348971536  |
| C | 2.1611255876  | 1.3688706316  | 0.8357178004  |
| C | 2.6596670825  | 0.7965197918  | -0.3249269802 |
| C | -1.4065035085 | -0.6124114140 | -0.2645187351 |
| C | -1.2078397814 | 0.6922517885  | -0.5556236736 |
| C | -1.6775563643 | 1.7265751384  | 0.3104583665  |
| C | -0.5453358681 | 1.1014930018  | -1.7529898309 |
| C | -0.9218952931 | -1.6592322021 | -1.1128399328 |
| C | -2.1221122964 | -1.0228647890 | 0.9009298637  |
| H | 3.0585961046  | -1.0157849445 | -1.3999367890 |
| H | 2.1994595978  | -2.4825957652 | 0.3978885047  |
| H | 1.3133135093  | -1.4722025823 | 2.4842463949  |
| H | 1.2898751966  | 0.9723021795  | 2.7502478827  |
| H | 2.1555299636  | 2.4440811699  | 0.9636518904  |

|   |               |               |               |
|---|---------------|---------------|---------------|
| H | 3.0399745202  | 1.4287150423  | -1.1181870402 |
| N | -2.0491226017 | 2.5673379004  | 0.9953287684  |
| N | -0.0440714890 | 1.4471451074  | -2.7243381460 |
| N | -0.5553441695 | -2.5171855763 | -1.7790375492 |
| N | -2.6977245548 | -1.3710496683 | 1.8294801566  |
| C | 2.9768069191  | -0.0447151495 | -0.1322301463 |
| C | 2.3839038941  | -1.1916933836 | 0.3796347936  |
| C | 1.4089933580  | -1.0889735448 | 1.3638498589  |
| C | 1.0204151906  | 0.1606418465  | 1.8296788369  |
| C | 1.6499125247  | 1.3036217421  | 1.3566644552  |
| C | 2.6159939039  | 1.2019513547  | 0.3614115050  |
| C | -1.0969854227 | -0.7000887094 | -0.4773447506 |
| C | -1.2454229408 | 0.6422890362  | -0.5073186560 |
| C | -0.6288346274 | 1.4451829888  | -1.5157559856 |
| C | -2.0253458708 | 1.3302164181  | 0.4714415177  |
| C | -1.7839216234 | -1.5132036497 | 0.4778159986  |
| C | -0.3270326275 | -1.3799959141 | -1.4691634067 |
| H | 3.7237319611  | -0.1250553518 | -0.9123442074 |
| H | 2.6676328511  | -2.1639497965 | -0.0035199991 |
| H | 0.9463622101  | -1.9838466379 | 1.7639649543  |
| H | 0.2628784074  | 0.2418142793  | 2.6000814560  |
| H | 1.3758461849  | 2.2769462426  | 1.7457460439  |



|   |               |               |               |
|---|---------------|---------------|---------------|
| H | 3.0910333110  | 2.0953172168  | -0.0281789728 |
| N | -0.1679046116 | 2.1149412962  | -2.3238234146 |
| N | -2.6357000362 | 1.9074812642  | 1.2512769823  |
| N | -2.3381650539 | -2.1750796811 | 1.2318913540  |
| N | 0.2470613078  | -1.9432236864 | -2.2857306113 |

Ind-TCNE

|   |               |               |               |
|---|---------------|---------------|---------------|
| C | -2.3259887304 | 1.8354767206  | 0.3462999336  |
| C | -2.5346929076 | 0.4978474643  | 0.0479152682  |
| C | -1.7622021420 | -0.1519344950 | -0.9239525734 |
| C | -0.7884422105 | 0.5422395239  | -1.6171849769 |
| C | -0.5771246026 | 1.8872520002  | -1.3182970945 |
| C | -1.3366220623 | 2.5252142337  | -0.3423534104 |
| C | -3.4928485591 | -0.4584307811 | 0.5942213390  |
| C | -2.2145563860 | -1.5847593479 | -1.0174106092 |
| C | -3.3170494698 | -1.6409989918 | 0.0007895056  |
| C | 2.0776751162  | -0.6971038867 | -0.1126020670 |
| C | 1.7160613859  | 0.0285284239  | 0.9712464192  |
| C | 0.9632777473  | -0.5566940132 | 2.0366621894  |
| C | 2.0477398784  | 1.4095131722  | 1.1110904091  |
| C | 2.7842553340  | -0.1322167337 | -1.2154555847 |

|   |               |               |               |
|---|---------------|---------------|---------------|
| C | 1.7094132303  | -2.0746709896 | -0.2153571689 |
| H | -4.2212036074 | -0.2326538662 | 1.3624227256  |
| H | -3.8821791666 | -2.5415037047 | 0.2054001285  |
| H | -1.4144392952 | -2.2957788412 | -0.7837345755 |
| H | -2.5747434530 | -1.8405682302 | -2.0192903986 |
| H | -0.2050407988 | 0.0579539241  | -2.3930450322 |
| H | 0.1821969738  | 2.4452747234  | -1.8517232747 |
| H | -1.1588229197 | 3.5705095195  | -0.1220255555 |
| H | -2.9275627374 | 2.3336236648  | 1.0979942131  |
| N | 0.3581407363  | -1.0061403444 | 2.9007523908  |
| N | 2.3108359767  | 2.5152817325  | 1.2596290922  |
| N | 3.3473497256  | 0.3148220047  | -2.1081337298 |
| N | 1.4039042321  | -3.1759569848 | -0.3097434450 |
|   |               |               |               |
| C | -1.6250600278 | 1.9383049079  | -0.3527946544 |
| C | -2.3178479509 | 0.7589761887  | -0.1069203076 |
| C | -2.0786149525 | -0.3755089023 | -0.8969260245 |
| C | -1.1461887842 | -0.3427370164 | -1.9187543116 |
| C | -0.4476799683 | 0.8394853019  | -2.1575655042 |
| C | -0.6911017625 | 1.9696947111  | -1.3833050408 |
| C | -3.3101666672 | 0.4204383356  | 0.9098960624  |
| C | -2.9568302164 | -1.4915150756 | -0.4030587908 |
| C | -3.6854281805 | -0.8502711355 | 0.7488666535  |

|   |               |               |               |
|---|---------------|---------------|---------------|
| C | 1.6592399421  | -0.9212967196 | 0.4557922390  |
| C | 2.0162381673  | 0.3673588199  | 0.6516584461  |
| C | 3.1629280556  | 0.9330143258  | 0.0136096337  |
| C | 1.2934635985  | 1.2211154055  | 1.5400052462  |
| C | 0.5215769837  | -1.4877812763 | 1.1091260843  |
| C | 2.4410584809  | -1.8108879426 | -0.3421663116 |
| H | -3.6709677766 | 1.1042495596  | 1.6661755790  |
| H | -4.4059928565 | -1.3831894944 | 1.3531389712  |
| H | -2.3744169094 | -2.3590112243 | -0.0770773191 |
| H | -3.6426881318 | -1.8463906063 | -1.1805793247 |
| H | -0.9612343544 | -1.2150182520 | -2.5368160951 |
| H | 0.2821891321  | 0.8846418240  | -2.9576427214 |
| H | -0.1520734263 | 2.8871205861  | -1.5906624576 |
| H | -1.7991315423 | 2.8186607783  | 0.2544149392  |
| N | 4.0799984415  | 1.4089343879  | -0.4832135564 |
| N | 0.7560433416  | 1.9152763509  | 2.2767266582  |
| N | -0.3543836357 | -1.9944154901 | 1.6476713223  |
| N | 3.0662943423  | -2.5354632156 | -0.9732816378 |
| C | 1.2810268655  | 2.0333129143  | 0.0226110798  |
| C | 2.0152184641  | 0.8526805875  | 0.0951368773  |
| C | 1.7056496175  | -0.1044967215 | 1.0770804149  |
| C | 0.6861353093  | 0.1116836170  | 1.9851237835  |

|   |               |               |               |
|---|---------------|---------------|---------------|
| C | -0.0430204236 | 1.2981643803  | 1.9106621860  |
| C | 0.2542377223  | 2.2458058019  | 0.9364154921  |
| C | 3.1435859969  | 0.3603050465  | -0.6909215935 |
| C | 2.6502058237  | -1.2641635291 | 0.9294846193  |
| C | 3.5204045839  | -0.8327474388 | -0.2210061336 |
| C | -1.0434740232 | -0.2652643079 | -1.0647197210 |
| C | -1.8765191088 | -0.5880725160 | -0.0517518727 |
| C | -2.8967947147 | 0.3134147229  | 0.3829948396  |
| C | -1.8199728024 | -1.8631089329 | 0.5877603983  |
| C | -0.1049612450 | -1.1956501614 | -1.6030330557 |
| C | -1.1910596355 | 0.9820468079  | -1.7467140504 |
| H | 3.5931675381  | 0.8906800203  | -1.5192476853 |
| H | 4.3323089624  | -1.4372530946 | -0.5987035913 |
| H | 2.1227459810  | -2.1974859922 | 0.7031090121  |
| H | 3.2247152099  | -1.4449560112 | 1.8437991575  |
| H | 0.4497596639  | -0.6252759761 | 2.7450574837  |
| H | -0.8462386912 | 1.4858722846  | 2.6136114269  |
| H | -0.3287439030 | 3.1576240628  | 0.8833627846  |
| H | 1.4990605907  | 2.7787698762  | -0.7326853925 |
| N | -3.7420442544 | 1.0107368082  | 0.7204280279  |
| N | -1.7978790986 | -2.8882354539 | 1.1004016143  |
| N | 0.6300178466  | -1.9506602207 | -2.0565563221 |
| N | -1.3346770244 | 1.9523642287  | -2.3405711832 |

|   |                |                |                |
|---|----------------|----------------|----------------|
| C | 1. 6728330322  | -1. 6465329207 | 0. 8801965807  |
| C | 2. 1265869871  | -0. 4526768847 | 0. 3367042633  |
| C | 1. 8433957353  | -0. 1204265729 | -0. 9953479722 |
| C | 1. 1075779052  | -0. 9782170852 | -1. 7931029365 |
| C | 0. 6557828634  | -2. 1780718473 | -1. 2488982120 |
| C | 0. 9371395259  | -2. 5072982119 | 0. 0741611129  |
| C | 2. 9313034556  | 0. 6208204980  | 0. 9191941409  |
| C | 2. 4821896794  | 1. 2069139511  | -1. 3073166268 |
| C | 3. 1499612043  | 1. 5615933409  | -0. 0035060853 |
| C | -1. 6296614900 | -0. 1042035148 | 0. 7457602406  |
| C | -1. 6410246059 | 0. 9424263047  | -0. 1069336215 |
| C | -2. 2137722808 | 0. 8205058569  | -1. 4100246093 |
| C | -1. 1122343820 | 2. 2190264201  | 0. 2528060184  |
| C | -1. 0970416978 | -0. 0053907222 | 2. 0671629614  |
| C | -2. 2167287630 | -1. 3528896136 | 0. 3719275170  |
| H | 3. 2824794223  | 0. 6415494134  | 1. 9413707209  |
| H | 3. 7105326962  | 2. 4753684723  | 0. 1366582639  |
| H | 1. 7478027421  | 1. 9652815804  | -1. 6031120464 |
| H | 3. 1986399253  | 1. 1348530809  | -2. 1319864226 |
| H | 0. 8919702639  | -0. 7352743130 | -2. 8277713419 |
| H | 0. 0829375565  | -2. 8650257832 | -1. 8593442361 |
| H | 0. 5791754090  | -3. 4463125509 | 0. 4784897400  |

|   |               |               |               |
|---|---------------|---------------|---------------|
| H | 1.8929560982  | -1.9033611425 | 1.9096285305  |
| N | -2.6817436528 | 0.7361022087  | -2.4533165914 |
| N | -0.7043384365 | 3.2583463431  | 0.5138805333  |
| N | -0.6975198760 | 0.0698766277  | 3.1392015251  |
| N | -2.7199053520 | -2.3479418198 | 0.1052072841  |
| C | -1.6834304312 | -1.9497673494 | -0.5755193195 |
| C | -2.3738350789 | -0.7823776614 | -0.2813799378 |
| C | -1.9675004056 | 0.4458182287  | -0.8228742367 |
| C | -0.8831860058 | 0.5095971387  | -1.6773398857 |
| C | -0.1979247373 | -0.6654545384 | -1.9850761899 |
| C | -0.5903773975 | -1.8802260298 | -1.4310498223 |
| C | -3.5620094161 | -0.5563069622 | 0.5373903774  |
| C | -2.8927181881 | 1.5207628570  | -0.3211375678 |
| C | -3.8644664807 | 0.7438449729  | 0.5243275160  |
| C | 2.2544198076  | 0.5400543991  | 0.1468958879  |
| C | 1.4378321029  | -0.0261193362 | 1.0650000899  |
| C | 1.5501332347  | -1.4020741915 | 1.4325015726  |
| C | 0.4195342020  | 0.7309361499  | 1.7234471570  |
| C | 2.1191781160  | 1.9170442659  | -0.2090903216 |
| C | 3.2818595640  | -0.2046404726 | -0.5065700367 |
| H | -4.0957124914 | -1.3302511831 | 1.0718594214  |
| H | -4.6915789322 | 1.2057318137  | 1.0456342334  |

|   |               |               |               |
|---|---------------|---------------|---------------|
| H | -3.3943632267 | 2.0520055424  | -1.1364539015 |
| H | -2.3638598147 | 2.2735833744  | 0.2729761035  |
| H | -0.5718159969 | 1.4543641118  | -2.1095680104 |
| H | 0.6445244813  | -0.6367504291 | -2.6658627205 |
| H | -0.0471211158 | -2.7842261916 | -1.6803775333 |
| H | -1.9965717683 | -2.8988594163 | -0.1563711518 |
| N | 1.6329536192  | -2.5015206284 | 1.7477416125  |
| N | -0.3859099228 | 1.3361664704  | 2.2712331581  |
| N | 2.0172739002  | 3.0207424151  | -0.5035684922 |
| N | 4.1092934663  | -0.7967033842 | -1.0341584288 |
| C | -1.6834304312 | -1.9497673494 | -0.5755193195 |
| C | -2.3738350789 | -0.7823776614 | -0.2813799378 |
| C | -1.9675004056 | 0.4458182287  | -0.8228742367 |
| C | -0.8831860058 | 0.5095971387  | -1.6773398857 |
| C | -0.1979247373 | -0.6654545384 | -1.9850761899 |
| C | -0.5903773975 | -1.8802260298 | -1.4310498223 |
| C | -3.5620094161 | -0.5563069622 | 0.5373903774  |
| C | -2.8927181881 | 1.5207628570  | -0.3211375678 |
| C | -3.8644664807 | 0.7438449729  | 0.5243275160  |
| C | 2.2544198076  | 0.5400543991  | 0.1468958879  |
| C | 1.4378321029  | -0.0261193362 | 1.0650000899  |
| C | 1.5501332347  | -1.4020741915 | 1.4325015726  |

|   |               |               |               |
|---|---------------|---------------|---------------|
| C | 0.4195342020  | 0.7309361499  | 1.7234471570  |
| C | 2.1191781160  | 1.9170442659  | -0.2090903216 |
| C | 3.2818595640  | -0.2046404726 | -0.5065700367 |
| H | -4.0957124914 | -1.3302511831 | 1.0718594214  |
| H | -4.6915789322 | 1.2057318137  | 1.0456342334  |
| H | -3.3943632267 | 2.0520055424  | -1.1364539015 |
| H | -2.3638598147 | 2.2735833744  | 0.2729761035  |
| H | -0.5718159969 | 1.4543641118  | -2.1095680104 |
| H | 0.6445244813  | -0.6367504291 | -2.6658627205 |
| H | -0.0471211158 | -2.7842261916 | -1.6803775333 |
| H | -1.9965717683 | -2.8988594163 | -0.1563711518 |
| N | 1.6329536192  | -2.5015206284 | 1.7477416125  |
| N | -0.3859099228 | 1.3361664704  | 2.2712331581  |
| N | 2.0172739002  | 3.0207424151  | -0.5035684922 |
| N | 4.1092934663  | -0.7967033842 | -1.0341584288 |
| C | -1.6598476476 | -1.0753713451 | 1.3945675464  |
| C | -1.5595982738 | 0.2873227925  | 1.1449442972  |
| C | -2.1615364375 | 0.8548763192  | 0.0134936117  |
| C | -2.8388432329 | 0.0584492788  | -0.8902632949 |
| C | -2.9284185138 | -1.3098418400 | -0.6460536956 |
| C | -2.3538139912 | -1.8685518630 | 0.4898323308  |
| C | -0.8946745106 | 1.3500527441  | 1.9004391796  |



|   |               |               |               |
|---|---------------|---------------|---------------|
| C | -1.9191558543 | 2.3401669526  | 0.0364656374  |
| C | -1.0928439190 | 2.5198820954  | 1.2841810481  |
| C | 1.8048036309  | 0.2761665151  | -0.7869329083 |
| C | 1.6919087076  | -0.9409718597 | -0.2071345234 |
| C | 0.8514939612  | -1.9652126296 | -0.7368917376 |
| C | 2.4453319861  | -1.2690538033 | 0.9627173687  |
| C | 2.7658060333  | 1.2223650878  | -0.3117877510 |
| C | 0.9937118644  | 0.6812215842  | -1.8880159083 |
| H | -0.3523481185 | 1.2005928828  | 2.8244888167  |
| H | -0.7340711438 | 3.4836961706  | 1.6205318425  |
| H | -2.8584478150 | 2.9006258613  | 0.0973414891  |
| H | -1.4044590200 | 2.6949374741  | -0.8625352104 |
| H | -3.2922629426 | 0.4843359749  | -1.7776244607 |
| H | -3.4415782305 | -1.9498989770 | -1.3533848925 |
| H | -2.4274826531 | -2.9360994561 | 0.6560989532  |
| H | -1.2111713351 | -1.5121248181 | 2.2801978279  |
| N | 0.2305693663  | -2.8293781297 | -1.1644418005 |
| N | 3.0320215386  | -1.5332871321 | 1.9119633891  |
| N | 3.5385461098  | 1.9863864641  | 0.0544141292  |
| N | 0.3445175845  | 1.0408200580  | -2.7623634923 |
| C | 1.2111504893  | -0.8874400772 | -1.7174821003 |
| C | 1.7658627924  | 0.2052220372  | -1.0626225270 |

|   |               |               |               |
|---|---------------|---------------|---------------|
| C | 2.4963924028  | 0.0455389236  | 0.1193008831  |
| C | 2.6879069025  | -1.2184792979 | 0.6480590178  |
| C | 2.1425166457  | -2.3168392271 | -0.0120730008 |
| C | 1.4089349770  | -2.1536974644 | -1.1823890488 |
| C | 1.7650274869  | 1.6219534585  | -1.4281512233 |
| C | 2.9693354579  | 1.4025919445  | 0.5707347321  |
| C | 2.4476787783  | 2.3144436225  | -0.5124391871 |
| C | -1.8792350605 | 0.7647038810  | 0.4553833250  |
| C | -1.9261387423 | -0.5863913537 | 0.4845425265  |
| C | -1.1001634705 | -1.3536155042 | 1.3587727813  |
| C | -2.8341066169 | -1.3089781224 | -0.3501706479 |
| C | -2.7775332022 | 1.5130905876  | -0.3679356044 |
| C | -0.9432399344 | 1.5099760909  | 1.2328430318  |
| H | 1.2896799114  | 2.0286176382  | -2.3103827913 |
| H | 2.6128245635  | 3.3824477076  | -0.5121908204 |
| H | 4.0597067413  | 1.4526003713  | 0.6559979593  |
| H | 2.5603405067  | 1.6756373378  | 1.5495684544  |
| H | 3.2580530421  | -1.3622663557 | 1.5583995344  |
| H | 2.2908770837  | -3.3112030723 | 0.3901534505  |
| H | 1.0034865185  | -3.0216412980 | -1.6896311177 |
| H | 0.6590376803  | -0.7563951009 | -2.6418796419 |
| N | -0.4800269595 | -1.9910229320 | 2.0817687612  |
| N | -3.5537085718 | -1.8927490311 | -1.0251800718 |

|   |               |               |               |
|---|---------------|---------------|---------------|
| N | -3.4946688749 | 2.1279148756  | -1.0175407508 |
| N | -0.2052912950 | 2.1212837448  | 1.8623650929  |
| C | 1.1688963114  | -1.0625462944 | -1.4843790908 |
| C | 1.5261555845  | 0.2322306722  | -1.1242262062 |
| C | 2.3782636610  | 0.4597321294  | -0.0355926323 |
| C | 2.8873673488  | -0.6025918005 | 0.6881666552  |
| C | 2.5276995596  | -1.8979282798 | 0.3281971435  |
| C | 1.6739569688  | -2.1256369125 | -0.7466416963 |
| C | 1.1385935583  | 1.5252782681  | -1.6915267156 |
| C | 2.5636967734  | 1.9459525863  | 0.1209027494  |
| C | 1.7098345036  | 2.5052439767  | -0.9855484968 |
| C | -1.2892378295 | 0.1405136740  | 0.9026923768  |
| C | -2.0865106602 | -0.3567615083 | -0.0685997857 |
| C | -2.9484220195 | 0.4936224261  | -0.8263715058 |
| C | -2.1345446823 | -1.7501664185 | -0.3710094210 |
| C | -0.4724240626 | -0.6836057048 | 1.7293580059  |
| C | -1.3559382646 | 1.5250787825  | 1.2519317529  |
| H | 0.4871210615  | 1.6503840140  | -2.5472945471 |
| H | 1.6040006598  | 3.5644150401  | -1.1724094368 |
| H | 3.6124926217  | 2.2394970434  | 0.0064276437  |
| H | 2.2458680203  | 2.3057500304  | 1.1053587766  |
| H | 3.5411465199  | -0.4371557617 | 1.5366221626  |

|   |               |               |               |
|---|---------------|---------------|---------------|
| H | 2.8962117463  | -2.7382002443 | 0.9029172478  |
| H | 1.3889783924  | -3.1392532151 | -1.0017033867 |
| H | 0.5102635604  | -1.2438436069 | -2.3269481669 |
| N | -3.6442193362 | 1.1666659036  | -1.4414888473 |
| N | -2.2130460529 | -2.8672106249 | -0.6159291982 |
| N | 0.1313828802  | -1.3328517855 | 2.4557538850  |
| N | -1.4027364245 | 2.6300832823  | 1.5543713702  |
| C | -1.5258837409 | -0.1494451164 | -1.8686299195 |
| C | -2.4656343455 | -0.3245875274 | -0.8602007884 |
| C | -2.6473866149 | 0.6442447577  | 0.1297483592  |
| C | -1.8987066834 | 1.8073903776  | 0.1094094829  |
| C | -0.9596457705 | 1.9891305460  | -0.9038041099 |
| C | -0.7694636605 | 1.0162306425  | -1.8813669466 |
| C | -3.3573372053 | -1.4513842156 | -0.5899822437 |
| C | -3.6815893030 | 0.1376895517  | 1.1004444135  |
| C | -4.0505801553 | -1.2105053390 | 0.5250423341  |
| C | 1.7569694470  | -0.8097360339 | 0.4303009322  |
| C | 2.4518029281  | 0.3464410589  | 0.3351781102  |
| C | 3.7501170932  | 0.3696862506  | -0.2649691662 |
| C | 1.9677026003  | 1.5853265494  | 0.8498128325  |
| C | 0.4874086862  | -0.9191919075 | 1.0689453739  |
| C | 2.3585444191  | -2.0299238218 | -0.0125263469 |

|   |               |               |               |
|---|---------------|---------------|---------------|
| H | -3.4196788961 | -2.3387303542 | -1.2046706972 |
| H | -4.7793285329 | -1.8662874117 | 0.9781508975  |
| H | -4.5479341258 | 0.8038569656  | 1.1681400172  |
| H | -3.2650405994 | 0.0429609158  | 2.1080432501  |
| H | -2.0229756950 | 2.5684278587  | 0.8707353708  |
| H | -0.3666579289 | 2.8952621542  | -0.9277716179 |
| H | -0.0340927524 | 1.1744225857  | -2.6626871913 |
| H | -1.3820492263 | -0.9069163400 | -2.6312351565 |
| N | 4.7916084063  | 0.3972352612  | -0.7436793734 |
| N | 1.6274331399  | 2.5962183771  | 1.2699578682  |
| N | -0.4984765792 | -1.0542455967 | 1.6373506259  |
| N | 2.8334928104  | -3.0171086957 | -0.3499433738 |
